# Supplementary material for: Genomic erosion and extensive horizontal gene transfer in gut-associated Acetobacteraceae
Source: PubMed Central journal article supplement (PMC6558740; doi:10.1186/s12864-019-5844-5), 2019-06-10
Supplement: 12864_2019_5844_MOESM1_ESM.pdf [file 12864_2019_5844_MOESM1_ESM.pdf]

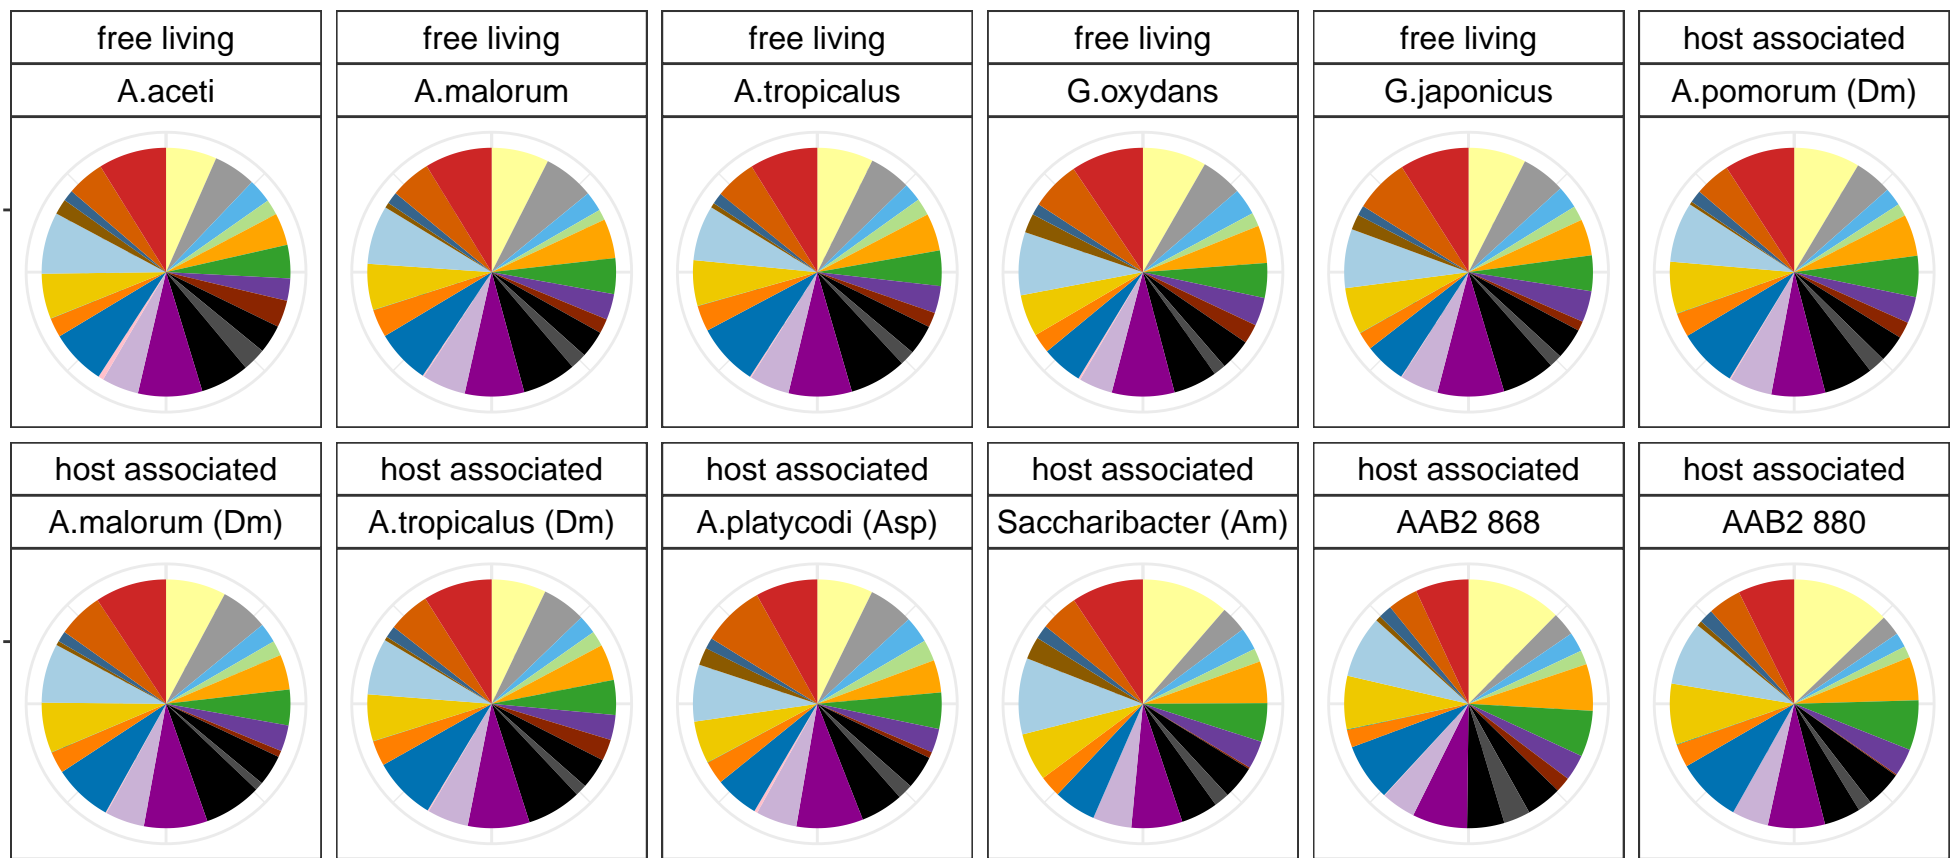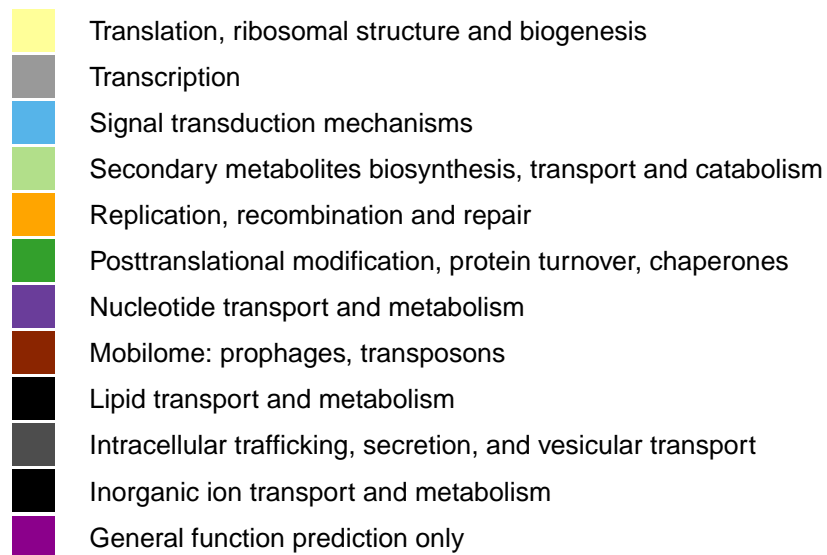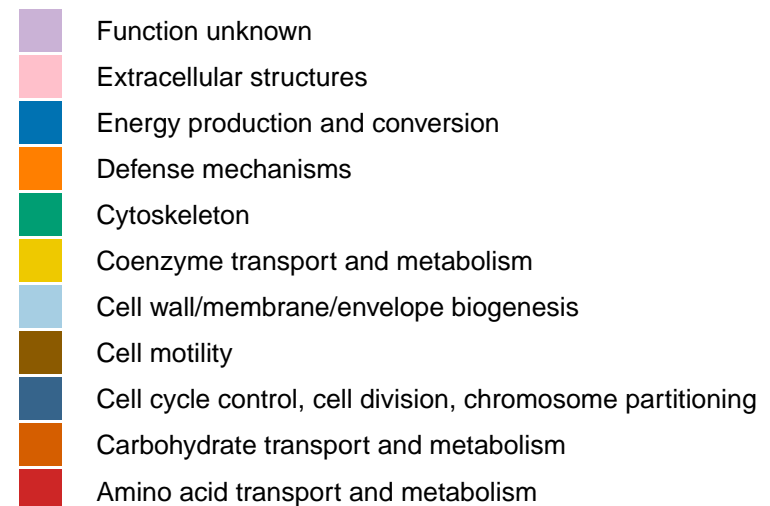

COG
